# Supplementary material for: Mechanism and kinetics characteristic of self-discharge of FeS2 cathodes for thermal batteries
Source: Royal Society of Chemistry journal article supplement (doi:10.1039/d0cp04576d), 2020-11-27
Supplement: d0cp04576d2.pdf [file d0cp04576d2.pdf]

## Supporting Information

### Mechanism and Kinetics Characteristic of Self-discharge of FeS<sub>2</sub>

#### Cathode for Thermal Batteries

*Xicheng Zhang<sup>a</sup>, Chao Wang<sup>\*b</sup>, Peng Yang<sup>a</sup>, Xu Zhang<sup>b</sup>, Jianqing Liu<sup>b</sup>, Wei Chen<sup>b</sup>,  
Yixiu Cui<sup>b</sup>, Xiaojiang Liu<sup>b</sup> and Xinlu Li<sup>\*a</sup>*

*<sup>a</sup> School of Materials Science and Engineering, Chongqing University,  
Chongqing 400030, China.*

*<sup>b</sup> Institute of Electronic Engineering, China Academy of Engineering Physics,  
Mianyang 621900, China.*

\* Corresponding author: Xinlu Li

E-mail: [lixinlu@cqu.edu.cn](mailto:lixinlu@cqu.edu.cn)

\* Corresponding author: Chao Wang

E-mail: [wangchao\\_1988924@126.com](mailto:wangchao_1988924@126.com)

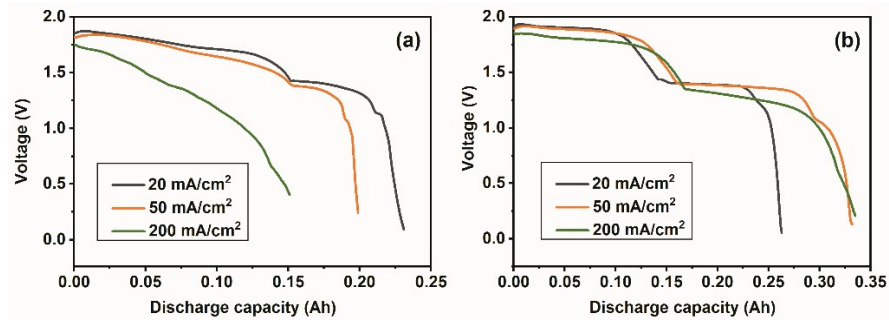

**Fig. S1** galvanostatic discharge curves at (a) 450 °C and (b) 550 °C

Fig. S1 (a) and (b) show galvanostatic discharge curves at different current densities until 0 V at 450 and 550 °C. At 450 °C, it can be seen the discharge capacity gets smaller with the increase of current densities. The discharge capacity at 20, 50 and 200 mA/cm<sup>2</sup> is 0.231, 0.202 and 0.152 Ah, respectively, which is less than the theoretical capacity of 0.414 Ah. At 550 °C, the discharge capacity at 20, 50 and 200 mA/cm<sup>2</sup> is 0.262, 0.330 and 0.336 Ah, respectively, which is larger than that at 450 °C. This result is due to the smaller influence of polarization on capacity loss at 550 °C, which makes the discharge capacity larger. On the other hand, the discharge capacity increases with the increase of current densities at 550 °C, since the discharge time decreases at the larger current densities, which makes capacity loss of self-discharge decrease. Hence, polarization is a limiting factor on discharge capacity, especially at the relatively large current density and low temperature.
