# Supplementary figures and images for: Mechanism and kinetics characteristic of self-discharge of FeS2 cathodes for thermal batteries
Source: Royal Society of Chemistry journal article supplement (doi:10.1039/d0cp04576d), 2020-11-27

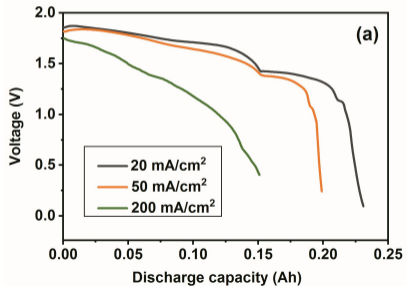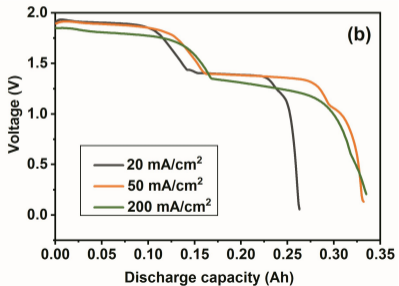

Supplement: d0cp04576d1.pdf [file d0cp04576d1.pdf]
